# Supplementary material for: Himalayan black bulbuls (Hypsipetes leucocephalus niggerimus) exhibit sexual dichromatism under ultraviolet light that is invisible to the human eye
Source: PubMed Central journal article supplement (PMC5382547; doi:10.1038/srep43707), 2017-04-06
Supplement: srep43707-s1.pdf [file srep43707-s1.pdf]

**Himalayan black bulbuls (*Hypsipetes  
leucocephalus niggerimus*) exhibit sexual  
dichromatism under ultraviolet light that is invisible  
to the human eye  
(SREP-16-43919A)**

Hsin-Yi Hung, Carol K. L. Yeung, Kevin E. Omland, Cheng-Te Yao, Chiou-Ju Yao  
and Shou-Hsien Li\*

**Supplementary Figure S1 The colorimetric variables in carotenoid-based beak and tarsus between sexes in live birds.** The hollow dots indicate males and the solid dots indicate females. Two-way ANOVA test, factor “Year” included three categories: 2008, 2009 and 2011, factor “Sex” included two categories: female and male.

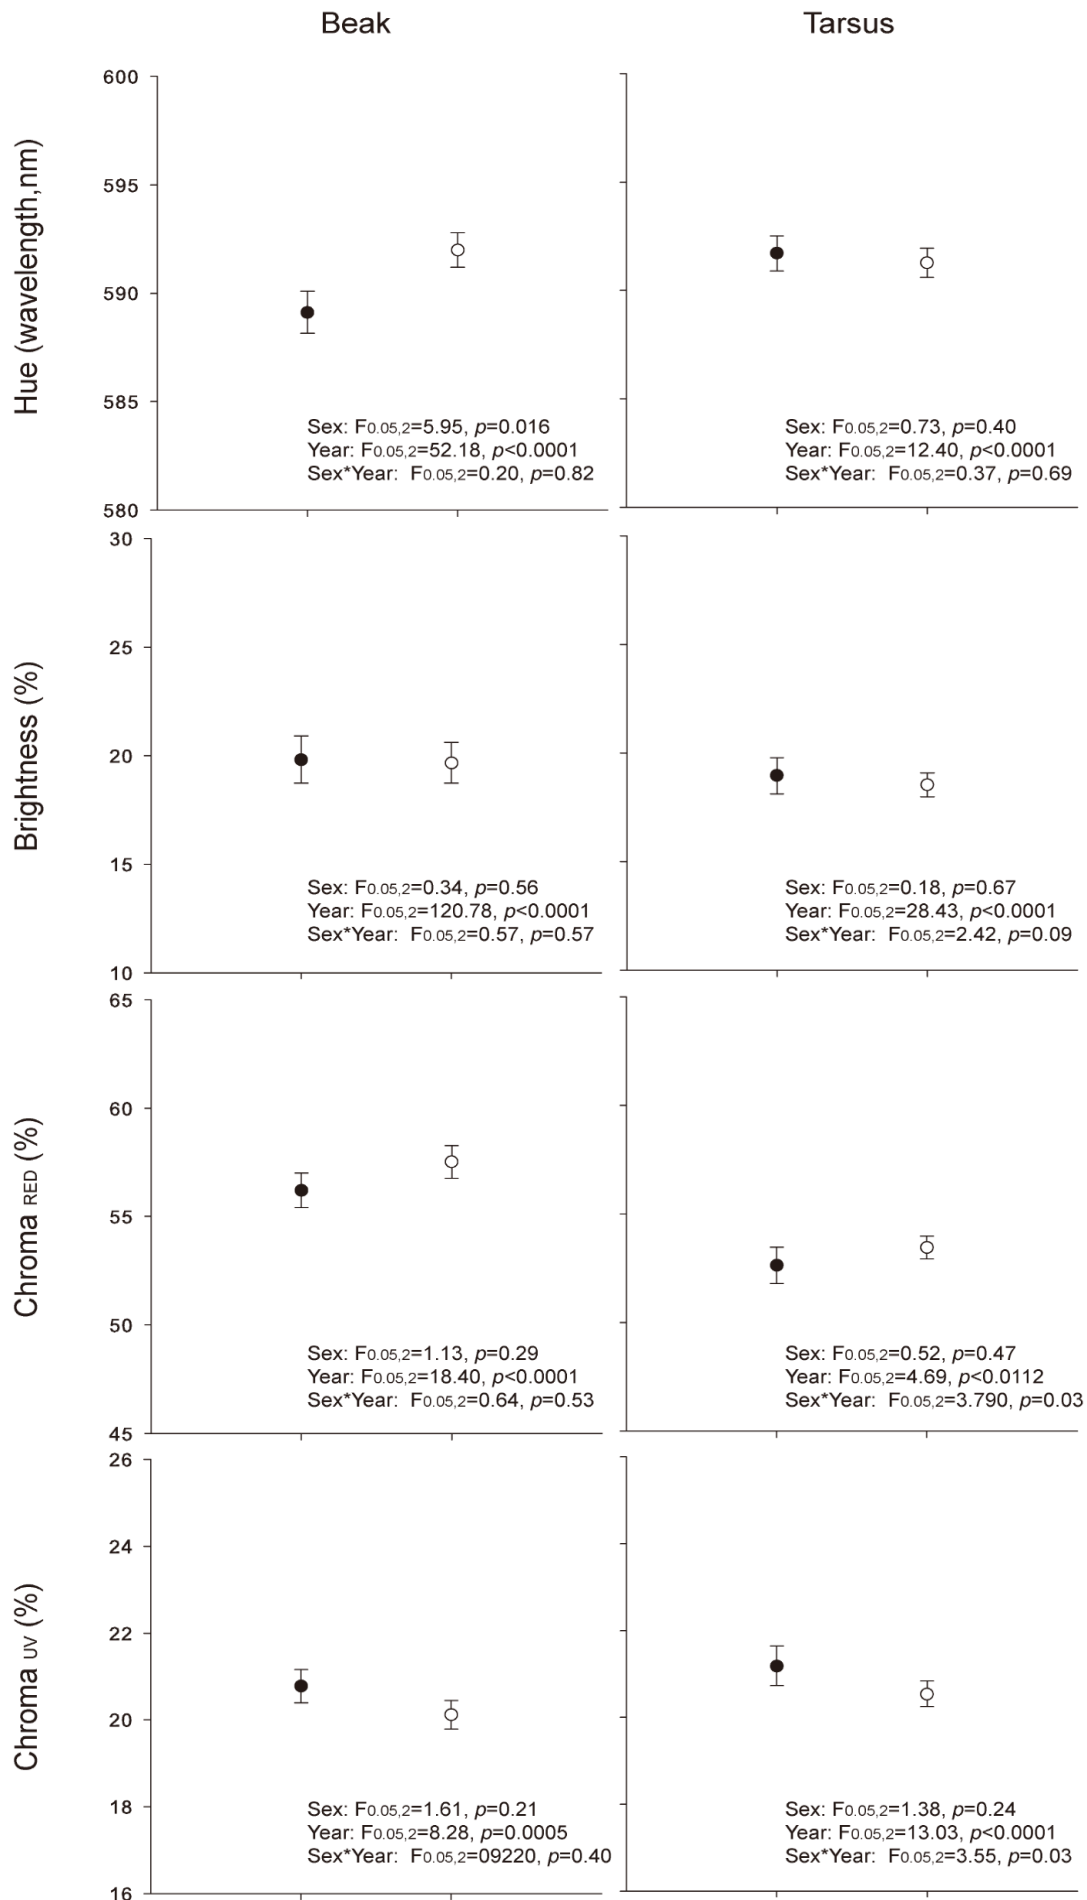

**Supplementary Table S1** Two-way ANOVA of different melanin-based parts between live birds and skin specimens

| Parts    | Variables | Total brightness |                  | Chroma <sub>uv</sub> |                  |
|----------|-----------|------------------|------------------|----------------------|------------------|
|          |           | <i>F</i>         | <i>p</i>         | <i>F</i>             | <i>p</i>         |
| Back     | Item      | 2.11             | 0.15             | 31.24                | <b>&lt;.0001</b> |
|          | Sex       | 2.48             | 0.12             | 8.95                 | <b>0.003</b>     |
|          | Item*Sex  | 2.78             | 0.10             | 8.93                 | <b>0.003</b>     |
| Belly    | Item      | 0.64             | 0.42             | 11.63                | <b>0.001</b>     |
|          | Sex       | 7.18             | <b>&lt;0.001</b> | 13.76                | <b>&lt;0.001</b> |
|          | Item*Sex  | 0.02             | 0.90             | 1.05                 | 0.31             |
| Nape     | Item      | 4.03             | 0.05             | 39.74                | <b>&lt;.0001</b> |
|          | Sex       | 0.05             | 0.83             | 9.32                 | <b>0.003</b>     |
|          | Item*Sex  | 0.01             | 0.96             | 4.31                 | 0.04             |
| Breast   | Item      | 10.30            | <b>&lt;0.002</b> | 41.82                | <b>&lt;.0001</b> |
|          | Sex       | 0.34             | 0.56             | 13.10                | <b>0.0004</b>    |
|          | Item*Sex  | 0.10             | 0.75             | 7.63                 | 0.007            |
| Forehead | Item      | 0.01             | 0.94             | 26.81                | <b>&lt;.0001</b> |
|          | Sex       | 0.17             | 0.68             | 9.41                 | <b>0.003</b>     |
|          | Item*Sex  | 0.72             | 0.40             | 5.53                 | 0.02             |
| Remige   | Item      | 0.00             | 0.97             | 4.68                 | 0.03             |
|          | Sex       | 2.77             | 0.10             | 2.16                 | 0.14             |
|          | Item*Sex  | 0.19             | 0.66             | 0.09                 | 0.76             |
| Scapular | Item      | 8.64             | <b>&lt;0.004</b> | 21.40                | <b>&lt;.0001</b> |
|          | Sex       | 0.31             | 0.58             | 9.77                 | <b>0.002</b>     |
|          | Item*Sex  | 0.54             | 0.46             | 3.35                 | 0.07             |
| Tail     | Item      | 19.52            | <b>&lt;.0001</b> | 9.42                 | <b>0.003</b>     |
|          | Sex       | 1.97             | 0.16             | 2.30                 | 0.13             |
|          | Item*Sex  | 0.10             | 0.76             | 0.06                 | 0.81             |

Item: live bird and specimen, df= 1

Sex: female and male, df= 1

Item\*sex: df=2.

Bold type indicates statistic significant (Bonferroin adjusted  $p = 0.005$ ).

**Supplementary Table S2** Two-way ANOVA of different melanin-based parts in skin specimens

| Parts    | Variables | Total brightness |          | Chroma <sub>uv</sub> |          |
|----------|-----------|------------------|----------|----------------------|----------|
|          |           | <i>F</i>         | <i>p</i> | <i>F</i>             | <i>p</i> |
| Back     | Sex       | 0.79             | 0.38     | 1.99                 | 0.17     |
|          | Year      | 1.44             | 0.26     | 1.73                 | 0.20     |
|          | Sex*Year  | 1.65             | 0.22     | 0.99                 | 0.39     |
| Belly    | Sex       | 1.94             | 0.18     | 3.20                 | 0.09     |
|          | Year      | 0.79             | 0.47     | 2.52                 | 0.10     |
|          | Sex*Year  | 0.07             | 0.94     | 0.11                 | 0.90     |
| Nape     | Sex       | 0.08             | 0.79     | 0.71                 | 0.41     |
|          | Year      | 0.38             | 0.69     | 0.99                 | 0.39     |
|          | Sex*Year  | 0.51             | 0.61     | 1.15                 | 0.34     |
| Breast   | Sex       | 0.05             | 0.84     | 4.37                 | 0.05     |
|          | Year      | 0.94             | 0.41     | 0.88                 | 0.43     |
|          | Sex*Year  | 0.14             | 0.87     | 0.11                 | 0.90     |
| Forehead | Sex       | 0.00             | 0.97     | 1.47                 | 0.24     |
|          | Year      | 0.09             | 0.91     | 1.26                 | 0.30     |
|          | Sex*Year  | 2.37             | 0.12     | 0.73                 | 0.50     |
| Remige   | Sex       | 0.22             | 0.65     | 0.15                 | 0.70     |
|          | Year      | 3.14             | 0.06     | 0.11                 | 0.90     |
|          | Sex*Year  | 0.69             | 0.52     | 0.05                 | 0.95     |
| Scapular | Sex       | 0.03             | 0.86     | 0.72                 | 0.41     |
|          | Year      | 3.70             | 0.04     | 0.34                 | 0.71     |
|          | Sex*Year  | 2.68             | 0.09     | 0.11                 | 0.89     |
| Tail     | Sex       | 0.39             | 0.54     | 0.96                 | 0.33     |
|          | Year      | 0.39             | 0.68     | 0.24                 | 0.79     |
|          | Sex*Year  | 0.35             | 0.71     | 0.98                 | 0.39     |

df: year-2, sex-1, sex\*year-2

Year: indicating the years after making into skin specimens, including within 5yrs, 10yrs and 15yrs.

Bold type indicates statistic significant (Bonferroin adjusted  $p = 0.005$ ).
